# Supplementary material
Source: PubMed Central journal article supplement (PMC2844552)
Supplement: SD2.pdf [file SD2.pdf]

SUPPLEMENTAL TABLE 1  
PCR primers and amplification conditions

| Gene | Polymorphism       | PCR primers                                                                      | Amplification conditions                                                      |
|------|--------------------|----------------------------------------------------------------------------------|-------------------------------------------------------------------------------|
| TLR2 | Arg753Gln          | Up 5'-GTCGGAATGTCACAGGACAGC-3' Dn 5'-GAACCTAGGACTTTATCGCAGC-3'                   | 94°C 4 min (1×), 94°C 1 min 45 sec, 70°C 1 min, 72°C 1 min (45×), 72°C 10 min |
| TLR4 | Asp299Gly          | Up 5'-GATTAGCATACTTAGACTACTACCTCGATG-3' Dn 5'-GATCAACTTCTGGCCCCAGCATTCCCAC-3'    | 95°C 4 min (1×), 95°C 30 sec, 55°C 30 sec, 72°C 30 sec (35×), 72°C 10 min.    |
|      | Thr399Ile          | Up 5'-GGTTGCTGTTCTCAAAGTGAATTTGGGAGAA-3' Dn 5'-ACCTGAAGACTGGAGAGTGAGTTAAATGCT-3' | Same as for Asp299Gly                                                         |
| TLR9 | -1486T/C, -1237T/C | Up 5'-ACTTACTATGTGCTGGGCACTG-3' Dn 5'-CCTGCTGCACTTGACTGTGTA-3'                   | Same as for TLR2                                                              |
|      | 1174G/A            | Up 5'-TTCTGCAGGTAGGGCTTGGAG-3' Dn 5'-GACAAGGAAAGGCTGGTGACAT-3'                   | Same as for TLR2                                                              |

SUPPLEMENTAL TABLE 2  
Common and allele-specific ligase detection reaction (LDR) primers and FlexMap microspheres\*

| Gene         | SNP          | GenBank accession no.                      | Primer sequence                                           | FlexMap microsphere |
|--------------|--------------|--------------------------------------------|-----------------------------------------------------------|---------------------|
| TLR2         | 753Arg       | rs7543708                                  | 5'-TCAATTACCTTTTCAATACAATACattccccagcgtctctgcaagctgcg-3'  | 24                  |
|              | 753Gln       |                                            | 5'-TCAATTACTTCACTTTAATCCTTTattccccagcgtctctgcaagctgca-3'  | 33                  |
|              | 753 common   |                                            | 5'/Phos/ gaagataatgaacaccaagacctac3' Biotin               |                     |
| TLR4         | 299Asp       | rs4986790                                  | 5'-AATCCTTTTACATTCATTACTTACgcatacttagactactacctgatga-3'   | 8                   |
|              | 299Gly       |                                            | 5'-TACTACTTTATCAAATCTTACAATCgcatacttagactactacctgatgg-3'  | 3                   |
|              | 299 common   |                                            | 5'/Phos/tattattgactatttaattgkttg3' Biotin                 |                     |
| TLR4         | 399Thr       | rs4986791                                  | 5'-TAATTATACATCTCATCTTCTACAtgttctcaaagtgattttgggacaac-3'  | 53                  |
|              | 399Ile       |                                            | 5'-CTACTATACATCTTACTATACTTTtgttctcaaagtgattttgggacaac-3'  | 14                  |
|              | 399 common   |                                            | 5'/Phos/carctaaagtagatctgagc3' Biotin                     |                     |
| TLR9         | -1486T       | rs187084                                   | 5'-TACTACTTTCTTTCTTTCTTTCTTTgagtcagataaaagatcactgccctt-3' | 12                  |
|              | -1486C       |                                            | 5'-TCAAAATCTCAAATACTCAAATCAgagtcagataaaagatcactgccctc-3'  | 18                  |
|              | -1486 common |                                            | 5'/Phos/aagaagctgacattccagcaggga3' Biotin                 |                     |
|              | -1237T       | rs5743836                                  | 5'-CTACAACAAACAAACATTATCAAggtcatatgagacttggggagttt-3'     | 28                  |
|              | -1237C       |                                            | 5'-TTACCTTTTATACCTTTCTTTTTACggtcatatgagacttggggagttt-3'   | 30                  |
| -1237 common |              | 5'/Phos/caggcagagggaacagcacatccca3' Biotin |                                                           |                     |
| TLR9         | 1174G        | rs352139                                   | 5'-CTTTTCATCAATAATCTTACCTTcccatgaagtggagtggtggaggtg-3'    | 65                  |
|              | 1174A        |                                            | 5'-CTATAAACATATTACATTCACATCcccatgaagtggagtggtggaggtg-3'   | 69                  |
|              | 1174 common  |                                            | 5'/Phos/gagctggggggccgacctcacac3' Biotin                  |                     |

\* "k" indicates degenerate G/T primers; "r" indicates G/A. Nucleotides in upper case letters (24 bases) represent the "TAG" sequence added to the 5' end of each allele-specific LDR primer. Primer sequences were designed based on Genbank single nucleotide polymorphism (SNP) accession numbers.
